## The COVID-19 Global Pandemic: Implications for People With Schizophrenia and Related Disorders

Nicole Kozloff<sup>1,2</sup>, Benoit H. Mulsant<sup>1,2</sup>, Vicky Stergiopoulos<sup>1,2</sup>, and Aristotle N. Voineskos<sup>\*1,2,Ⓞ</sup>

<sup>1</sup>Centre for Addiction and Mental Health, Toronto, Canada; <sup>2</sup>Department of Psychiatry, University of Toronto, Toronto, Canada

\*To whom correspondence should be addressed; Centre for Addiction and Mental Health, 250 College Street, Toronto, Canada; tel: +1-416-535-8501, fax: +1-416-260-4197, e-mail: [aristotle.voineskos@camh.ca](mailto:aristotle.voineskos@camh.ca)

**The coronavirus disease-19 (COVID-19) global pandemic has already had an unprecedented impact on populations around the world, and is anticipated to have a disproportionate burden on people with schizophrenia and related disorders. We discuss the implications of the COVID-19 global pandemic with respect to: (1) increased risk of infection and poor outcomes among people with schizophrenia, (2) anticipated adverse mental health consequences for people with schizophrenia, (3) considerations for mental health service delivery in inpatient and outpatient settings, and (4) potential impact on clinical research in schizophrenia. Recommendations emphasize rapid implementation of measures to both decrease the risk of COVID-19 transmission and maintain continuity of clinical care and research to preserve safety of both people with schizophrenia and the public.**

*Keywords:* COVID-19/coronavirus/schizophrenia/public health

### Introduction

Starting in January 2020, coronavirus disease-19 (COVID-19) has rapidly developed into a global pandemic with the number of deaths continuing to climb worldwide.<sup>1</sup> The World Health Organization (WHO) and many governments have promulgated social distancing and social isolation to slow the spread of the virus (ie, “flatten the curve”).<sup>2</sup> These public health efforts are targeting the entire population. However, these strategies may be less effective for certain marginalized groups, notably those with schizophrenia and related disorders (referred as schizophrenia in the rest of this manuscript). Features of these disorders, such as delusions, hallucinations, disorganized behavior, cognitive impairment, and poor insight, and

sociodemographic characteristics, including living in congregate housing and homelessness,<sup>3</sup> may put these individuals at higher risk of becoming infected with COVID-19. Furthermore, people living with schizophrenia are at greater risk for adverse outcomes, including death, because compared with the general population, they typically have poorer physical health,<sup>4–6</sup> greater socioeconomic disadvantage,<sup>7</sup> are more socially disconnected,<sup>8</sup> and experience pervasive stigma and discrimination.<sup>9</sup> Here, we discuss (1) why people with schizophrenia are at increased risk of infection with COVID-19 and poor outcomes; (2) possible mental health consequences of COVID-19 infection in people with schizophrenia; (3) possible consequences for health professionals and institutions that serve patients with schizophrenia; and (4) potential adverse impact on clinical research related to schizophrenia.

### Factors That Put People With Schizophrenia at Elevated Risk of Acquiring COVID-19 and of Experiencing Poor Outcomes

People with schizophrenia may be more susceptible to transmission of COVID-19 due to a number of factors: cognitive impairment, lower awareness of risk, and barriers to adequate infection control including congregate living.<sup>10</sup> As schizophrenia is characterized by impairments in insight and decision-making capacity,<sup>11</sup> it may be harder for people with schizophrenia to adopt and adhere to the protective measures recommended to prevent infection (eg, hand washing, social distancing or isolation, confinement).<sup>12</sup> Comorbid substance use disorders, highly prevalent in schizophrenia, may compound impairments in judgment and decision-making.<sup>13</sup> Furthermore, people with schizophrenia are overrepresented in vulnerable populations that are at increased risk for COVID-19 outbreaks,

including prisoners and individuals experiencing homelessness.<sup>14,15</sup> For these groups, as well as people living in congregate housing such as rooming houses and mental health supportive housing, social distancing is near impossible.

Multiple factors increase the risk of poor outcomes from COVID-19 in people with schizophrenia. Smoking, which is prevalent in more than 60% of people with schizophrenia,<sup>16</sup> may increase the risk of disease progression and severe complications from COVID-19, including death, via its effects on lung health and immune responsiveness.<sup>17</sup> Early but robust data indicate that mortality from COVID-19 is particularly elevated in people with comorbid conditions, in particular cardiovascular disease, diabetes, and chronic respiratory disease,<sup>18,19</sup> all of which are more common in people with schizophrenia than the general population.<sup>20–22</sup> Antipsychotic medications commonly prescribed in schizophrenia, particularly clozapine, appear to be associated with risk of death from pneumonia related to impaired swallowing, sedation, and hypersalivation, which worsen during the immune response due to a feedback loop that increases clozapine concentrations<sup>23</sup>; while we are unaware of evidence specifically linking clozapine to deaths from coronaviruses, there is at least a hypothetical risk. Several other factors put people with schizophrenia at risk: they experience substantial disparities in access to health care, related in part to the effects of stigma on help-seeking<sup>24,25</sup> and discrimination when they access care: they are more likely to experience underdiagnosis of comorbid physical illnesses, less likely to receive screening and definitive interventions, and generally receive poorer-quality care.<sup>26</sup> The WHO recommends that “isolating, testing and treating every suspected case, and tracing every contact” is the best way of preventing widespread community transmission.<sup>2</sup> Barriers to uptake of protective measures and appropriate use of health care services among people with schizophrenia could have profound implications for containment of the pandemic. Furthermore, preexisting health disparities could be exacerbated in the context of limited resources. Failure to promote fair and equitable resource allocation could result in more severe complications for people with schizophrenia, including death.<sup>27</sup> Mechanisms and guidelines to uphold the rights to health for people with schizophrenia and promote equitable outcomes are urgently needed.

### **Mental Health Impact of COVID-19 on Schizophrenia**

Previous outbreaks have had persistent mental health effects: following the 2003 Severe Acute Respiratory Syndrome (SARS) pandemic, significantly elevated rates of psychiatric disorders and psychological distress were present.<sup>28</sup> Researchers have already sounded the alarm on how the COVID-19 pandemic may affect the mental health of the general population, and more specifically patients with mental disorders.<sup>10</sup> If the stress related to the COVID-19 pandemic and corresponding public health measures worsens mental health in the general population,

one would expect that their impact might be even higher in people living with schizophrenia.<sup>29</sup> In addition, COVID-19 infection itself may exacerbate symptoms in people with schizophrenia, as coronaviruses may be associated with psychotic symptoms through an immune-related mechanism.<sup>30</sup> Furthermore, symptoms associated with coronaviruses and their treatment have been associated with distress related to symptom severity and isolation, as well as psychosis secondary to steroids and other interventions.<sup>31</sup>

Social distancing, whereby governments have discouraged and imposed restrictions to reduce physical proximity, has been widely adopted in order to decrease community transmission of COVID-19. Fears of contracting COVID-19, along with significant social isolation, have led to more than half of the general public surveyed in China to report that the outbreak had a moderate or severe psychological impact on them.<sup>32</sup> Social distancing practices could have a particularly negative impact on individuals with schizophrenia. Typically, individuals with schizophrenia on average have smaller and poorer-quality social networks than the general population.<sup>33</sup> Thus, they may be more able to comply with, and tolerate, social distancing directives. However, social support has been associated with higher scores on recovery measures in schizophrenia,<sup>34</sup> and broad community supports, including casual contacts at pharmacies, grocery stores, and cafes, have also been associated with improved recovery and community integration scores in schizophrenia.<sup>35</sup> These casual contacts will be disrupted by social distancing, putting patients at risk. Among people with schizophrenia, social isolation may increase the risk for suicide,<sup>36</sup> and stress has been associated with aggressive behavior.<sup>37</sup> Social distancing may also disproportionately impact the ability of people with schizophrenia to maintain their basic needs, given their high reliance on income support and other community services that become more difficult to access.<sup>38</sup> For those with substance dependence, changes in the ability to access substances and their treatments, including agonist therapies, can precipitate crises. Thus, developing approaches to maintain social connection to instrumental supports in the face of social distancing may be especially crucial for people with schizophrenia. Video conferencing apps are widely used to maintain face-to-face connection during the outbreak. Similarly, programs and government agencies that provide essential services to the community should strive to find ways to maintain their efforts to ensure continued and safe delivery of services to vulnerable populations.

### **Impact of the COVID-19 Pandemic on the Management of Inpatients and Outpatients With Schizophrenia**

The COVID-19 pandemic has created challenges for the health professionals and programs that provide services to patients with schizophrenia. Continuity of care is critical for these patients to prevent decompensation and its

consequences, including emergency department visits and hospital admissions resulting in further strain on the health care system, mental and physical deterioration, and even deaths.<sup>39</sup> In February 2020, a cluster of approximately 50 patients and 30 medical staff were diagnosed with COVID-19 at the Wuhan Mental Health Center.<sup>40</sup> Factors hypothesized to have increased the risk of outbreak on an inpatient psychiatric unit included: crowded wards, lack of isolation of suspected or early cases, and lack of clinical pathways to prevent infectious diseases in mental health settings.<sup>40</sup> A COVID-19 outbreak in a South Korean inpatient psychiatric unit infected 100 of its 102 patients and resulted in 7 deaths, at the time accounting for nearly half the COVID-19-related deaths in the country.<sup>41</sup> Factors identified as having contributed to this outbreak were the lack of ventilation due to windows having been sealed shut to prevent suicides, and restrictions on the use of hand sanitizer due to fears that some patients would drink it.<sup>42</sup> The recommendations of the Wuhan group included: use of a preadmission observation ward; screening of admitted patients; screening of hospital staff; temporary prohibition of in-person visitors, external food, and clothing; and improved skills among psychiatric care providers to identify and treat physical diseases.<sup>40</sup> Similar practices—including isolation of at-risk individuals, infection control training and audits—were successfully implemented on some psychiatric inpatient units during the 2003 SARS outbreak.<sup>43</sup> Additional concerns for psychiatric inpatient units include managing agitation, given the risk of contagion, and managing patients and staff who may have been exposed to COVID-19 in the face of shortages of both personal protective equipment and staff.<sup>44</sup> Strategies implemented at the Centre for Addiction and Mental Health in Toronto, Canada, modeled after a system developed during the 2003 SARS outbreak, involve designating different units to segregate patients with suspected infection, diagnosed infection, or absence of infection, and assignment to every inpatient psychiatrist of backup outpatient psychiatrists prepared to seamlessly assume care in the event that an inpatient psychiatrist becomes unable to work.

The immediate impact of COVID-19 could be even greater in outpatient settings, where the majority of mental health care is delivered. Evidence-based models of care for schizophrenia, including assertive community treatment and intensive case management, emphasize in-person contacts in the community and in patients' homes.<sup>45</sup> While outreach visits increase the risk of transmission to both patients and providers, abrupt changes to how mental health services are delivered could increase the risk of service disengagement, medication nonadherence, and distress, all leading to decompensation and relapse.

Phone and video consultations have been rapidly implemented as an alternative to in-person clinical care during the COVID-19 outbreak.<sup>46,47</sup> However,

there is little research examining the suitability of telepsychiatry for schizophrenia compared with other less severe mental disorders (eg, depressive and anxiety disorders) for which it has been typically used to date.<sup>48</sup> A recent randomized-controlled trial of adjunct videoconferencing in patients with severe mental illness compared with usual care found high levels of satisfaction associated with the service, but low use over the 18-month study period.<sup>49</sup> While mobile phone ownership approaches 100% in the general population in North America or Europe, the use of digital technologies is lower in those with psychosis.<sup>50,51</sup> Despite these challenges, outpatient services should strive to reduce in-person contacts when it is safe to do so through the use of telepsychiatry and the provision of longer prescription durations. In addition to digital solutions used to deliver direct patient care, automated text messages<sup>52</sup> and mobile applications<sup>53</sup> can augment care and provide support between appointments. In the midst of the pandemic, providers should be flexible and payers should remunerate care provided over either videoconferencing or phone to ensure access and uptake.<sup>54</sup>

Despite its merits, virtual care cannot completely replace in-person care for schizophrenia. For example, the ability to detain someone involuntarily still requires in person assessment and hearings in many jurisdictions. The COVID-19 pandemic may lead to an increase in the acceptability of telepsychiatry for these quasilegal processes, much as it has facilitated novel funding mechanisms for the expanded delivery of telehealth services.<sup>54</sup> Furthermore, in-person visits are required for the administration of long-acting injectable antipsychotic medications, which are increasingly used in the management of schizophrenia. Given the role of long-acting injectable antipsychotics in reducing hospitalizations compared with oral medications,<sup>55</sup> it is prudent to continue using them, even if these visits may increase the risk of infection for patients and providers. Similarly, clozapine is associated with superior outcomes (and reduced mortality) in treatment-resistant schizophrenia, but it requires regular bloodwork.<sup>56</sup> In response to the COVID-19 pandemic, the US Food and Drug Administration (FDA) has changed some of their regulations for laboratory monitoring requirements on an emergency basis.<sup>57</sup> Thus, during the pandemic, the frequency of blood monitoring required for clozapine maintenance could be reduced. However, the risks and benefits of such a change need to be carefully considered.

### Clinical Research

The FDA<sup>58</sup> and National Institutes of Health (NIH)<sup>59</sup> have provided guidance for researchers conducting clinical trials and human subject studies impacted by COVID-19, emphasizing safety of study participants. Suggestions

include coordination with institutional review boards to limit study visits to those needed for participant safety or coincident with clinical care, conducting virtual study visits, and arranging for required laboratory tests or imaging needed for safety monitoring to occur at local laboratories or clinics. Certain self-administered investigational products typically picked up at the study site may be delivered through alternative secure methods.<sup>58</sup> In addition to upholding the safety of research participants, it is important to safeguard the integrity of research efforts in schizophrenia, which despite its substantial global public health burden, has historically lagged in research funding compared with physical health conditions.<sup>60</sup> Clinical trials in schizophrenia typically have smaller sample sizes than in physical disorders associated with comparable disability and costs, reducing their statistical power and the generalizability of their results. A prolonged cessation of new recruitment into ongoing research studies, coupled with the reduction or elimination of in-person research visits will exacerbate the challenges already present in schizophrenia research, including challenges in study retention. Ensuring the safety of both participants and research staff should be the foremost priority. However, research with participants with schizophrenia should continue through the use of remote assessments and delivery methods in order to prevent worsening disparities in the progress of schizophrenia research.<sup>61</sup>

## Summary

The COVID-19 global pandemic is expected to have an outsized impact on people with schizophrenia, further exacerbating health and economic disparities they experience. Public health interventions designed to slow and curb the spread of the virus (flatten the curve) will likely disproportionately affect people with schizophrenia. We propose the following recommendations for consideration to temper the effect of COVID-19 on people with schizophrenia:

1. Addressing the social determinants of health, including ensuring safe and comfortable housing and implementing strategies to reduce health disparities, should be a foremost priority.
2. Guidelines for resource allocation in the context of the outbreak may help protect vulnerable populations by ensuring fair and consistent decision-making, acknowledging this may be challenging in the short-term, but remains a long-term goal.
3. Families, neighbors, and community-based programs that may comprise the social network for people with schizophrenia should find ways to maintain social connection that adhere to physical distancing, including through the use of video conferencing.
4. Programs and government agencies that provide essential services that address people's basic needs (eg,

income support, food banks) should find ways to continue to safely deliver them.

5. Inpatient mental health settings should develop capacity to rapidly isolate people with suspected and confirmed COVID-19 from each other and nonaffected patients; limit and screen people coming into the facilities; perform infection control training and audits, including proper use of personal protective equipment; and make contingency plans to introduce alternate trained personnel in case frontline staff become ill.
6. Outpatient mental health settings and their funders should embrace the use of telepsychiatry and other digital health interventions to support continuity of care. Prescribers, patients, and caregivers should weigh the risks and benefits of treatments that must be delivered or monitored in person. Long-acting injectable antipsychotics may be safer to continue than to stop, so long as appropriate infection control procedures are followed. Clozapine bloodwork may be completed less frequently to reduce the risk of COVID-19 transmission according with current FDA standards and with ample education provided to the treatment decision-maker.
7. Researchers and institutional review boards should work together to substitute remote assessments and delivery methods to allow studies to safely continue when possible.

We suggest that thoughtful consideration of the implications of COVID-19 for people with schizophrenia may not only reduce the burden of the global pandemic on people with schizophrenia, but also on the population as a whole.

## Funding

NK is supported by the Canadian Institutes of Health Research (CIHR), the Centre for Addiction and Mental Health (CAMH) Alternative Funding Plan Innovation Fund, and the CAMH Foundation. BHM receives research support from Brain Canada, CIHR, the CAMH Foundation, the Patient-Centered Outcomes Research Institute (PCORI), and the National Institutes of Health (NIH). VS is supported by CIHR. ANV is supported by CIHR, the National Institute of Mental Health (NIMH), the Natural Sciences and Engineering Research Council (NSERC), the CAMH Foundation, and the University of Toronto.

## Acknowledgment

During the past 3 years, BHM has received nonfinancial support from Eli Lilly (medications and matching placebo for a NIH-funded clinical trial) and Pfizer (medications for a NIH-funded clinical trial), Capital Solution Design LLC (software used in a study funded by the CAMH Foundation), and HAPPYneuron (software used in a study funded by Brain Canada).

## References

- World Health Organization. *Coronavirus disease 2019 (COVID-19): Situation Report - 67* Geneva, Switzerland: World Health Organization; March 27, 2020. [https://www.who.int/docs/default-source/coronaviruse/situation-reports/20200327-sitrep-67-covid-19.pdf?sfvrsn=b65f68eb\\_4](https://www.who.int/docs/default-source/coronaviruse/situation-reports/20200327-sitrep-67-covid-19.pdf?sfvrsn=b65f68eb_4). Accessed March 27, 2020.
- World Health Organization. *WHO Director-General's Opening Remarks at the Media Briefing on COVID-19 - 18 March 2020*. Geneva, Switzerland: World Health Organization; 2020. <https://www.who.int/dg/speeches/detail/who-director-general-s-opening-remarks-at-the-media-briefing-on-covid-19---18-march-2020>. Accessed March 27, 2020.
- Morgan VA, Waterreus A, Carr V, et al. Responding to challenges for people with psychotic illness: updated evidence from the Survey of High Impact Psychosis. *Aust N Z J Psychiatry*. 2017;51(2):124–140.
- Olfson M, Gerhard T, Huang C, Crystal S, Stroup TS. Premature mortality among adults with schizophrenia in the United States. *JAMA Psychiatry*. 2015;72(12):1172–1181.
- Saha S, Chant D, McGrath J. A systematic review of mortality in schizophrenia: is the differential mortality gap worsening over time? *Arch Gen Psychiatry*. 2007;64(10):1123–1131.
- Saxena S, Maj M. Physical health of people with severe mental disorders: leave no one behind. *World Psychiatry*. 2017;16(1):1–2.
- Saraceno B, Levav I, Kohn R. The public mental health significance of research on socio-economic factors in schizophrenia and major depression. *World Psychiatry*. 2005;4(3):181–185.
- Green MF, Horan WP, Lee J, McCleery A, Reddy LF, Wynn JK. Social disconnection in schizophrenia and the general community. *Schizophr Bull*. 2018;44(2):242–249.
- Thornicroft G, Brohan E, Rose D, Sartorius N, Leese M; INDIGO Study Group. Global pattern of experienced and anticipated discrimination against people with schizophrenia: a cross-sectional survey. *Lancet*. 2009;373(9661):408–415.
- Yao H, Chen JH, Xu YF. Patients with mental health disorders in the COVID-19 epidemic. *Lancet Psychiatry*. 2020;7(4):e21.
- Larkin A, Hutton P. Systematic review and meta-analysis of factors that help or hinder treatment decision-making capacity in psychosis. *Br J Psychiatry*. 2017;211(4):205–215.
- Maguire PA, Reay RE, Looi JC. Nothing to sneeze at—uptake of protective measures against an influenza pandemic by people with schizophrenia: willingness and perceived barriers. *Australas Psychiatry*. 2019;27(2):171–178.
- Hunt GE, Large MM, Cleary M, Lai HMX, Saunders JB. Prevalence of comorbid substance use in schizophrenia spectrum disorders in community and clinical settings, 1990–2017: systematic review and meta-analysis. *Drug Alcohol Depend*. 2018;191:234–258.
- Kinner SA, Young JT, Snow K, Southalan L, Lopez-Acuna D, Ferreira-Borges C, O'Moore E. Prisons and custodial settings are part of a comprehensive response to COVID-19. *Lancet Public Health*. 2020;5(4):e188–e189.
- Tsai J, Wilson M. COVID-19: a potential public health problem for homeless populations. *Lancet Public Health*. 2020;5(4):e186–e187.
- de Leon J, Diaz FJ. A meta-analysis of worldwide studies demonstrates an association between schizophrenia and tobacco smoking behaviors. *Schizophr Res*. 2005;76(2–3):135–157.
- Vardavas CI, Nikitara K. COVID-19 and smoking: a systematic review of the evidence. *Tob Induc Dis*. 2020;18:20.
- Wu Z, McGoogan JM. Characteristics of and important lessons from the coronavirus disease 2019 (COVID-19) outbreak in China: summary of a report of 72314 cases from the Chinese center for disease control and prevention [published online ahead of print February 24, 2020]. *JAMA*. doi:10.1001/jama.2020.2648
- Guan WJ, Liang WH, Zhao Y, et al. Comorbidity and its impact on 1590 patients with Covid-19 in China: a nationwide analysis [published online ahead of print March 26, 2020]. *Eur Respir J*. doi:10.1183/13993003.00547-2020
- Correll CU, Solmi M, Veronese N, et al. Prevalence, incidence and mortality from cardiovascular disease in patients with pooled and specific severe mental illness: a large-scale meta-analysis of 3,211,768 patients and 113,383,368 controls. *World Psychiatry*. 2017;16(2):163–180.
- Ward M, Druss B. The epidemiology of diabetes in psychotic disorders. *Lancet Psychiatry*. 2015;2(5):431–451.
- Zareifopoulos N, Bellou A, Spiropoulou A, Spiropoulos K. Prevalence of Comorbid chronic obstructive pulmonary disease in individuals suffering from schizophrenia and bipolar disorder: a systematic review. *COPD*. 2018;15(6):612–620.
- De Leon J, Sanz EJ, De Las Cuevas C. Data from the World Health Organization's pharmacovigilance database supports the prominent role of pneumonia in mortality associated with clozapine adverse drug reactions. *Schizophr Bull*. 2020;46(1):1–3.
- Thornicroft G, Mehta N, Clement S, et al. Evidence for effective interventions to reduce mental-health-related stigma and discrimination. *Lancet*. 2016;387(10023):1123–1132.
- Clement S, Schauman O, Graham T, et al. What is the impact of mental health-related stigma on help-seeking? A systematic review of quantitative and qualitative studies. *Psychol Med*. 2015;45(1):11–27.
- Lawrence D, Kisely S. Inequalities in healthcare provision for people with severe mental illness. *J Psychopharmacol*. 2010;24(4 suppl):61–68.
- Emanuel EJ, Persad G, Upshur R, et al. Fair allocation of scarce medical resources in the time of Covid-19 [published online ahead of print March 23, 2020]. *N Engl J Med*. doi:10.1056/NEJMs2005114
- Mak IW, Chu CM, Pan PC, Yiu MG, Chan VL. Long-term psychiatric morbidities among SARS survivors. *Gen Hosp Psychiatry*. 2009;31(4):318–326.
- Remington G, Foussias G, Agid O, Fervaha G, Takeuchi H, Hahn M. The neurobiology of relapse in schizophrenia. *Schizophr Res*. 2014;152(2–3):381–390.
- Severance EG, Dickerson FB, Viscidi RP, et al. Coronavirus immunoreactivity in individuals with a recent onset of psychotic symptoms. *Schizophr Bull*. 2011;37(1):101–107.
- Cheng SK, Tsang JS, Ku KH, Wong CW, Ng YK. Psychiatric complications in patients with severe acute respiratory syndrome (SARS) during the acute treatment phase: a series of 10 cases. *Br J Psychiatry*. 2004;184:359–360.
- Wang C, Pan R, Wan X, et al. Immediate psychological responses and associated factors during the initial stage of the 2019 Coronavirus disease (COVID-19) epidemic among the general population in China. *Int J Environ Res Public Health*. 2020;17(5):pii: E1729
- Degnan A, Berry K, Sweet D, Abel K, Crossley N, Edge D. Social networks and symptomatic and functional outcomes in schizophrenia: a systematic review and meta-analysis. *Soc Psychiatry Psychiatr Epidemiol*. 2018;53(9):873–888.

34. Corrigan PW, Phelan SM. Social support and recovery in people with serious mental illnesses. *Community Ment Health J*. 2004;40(6):513–523.
35. Townley G, Miller H, Kloos B. A little goes a long way: the impact of distal social support on community integration and recovery of individuals with psychiatric disabilities. *Am J Community Psychol*. 2013;52(1–2):84–96.
36. Montross LP, Zisook S, Kasckow J. Suicide among patients with schizophrenia: a consideration of risk and protective factors. *Ann Clin Psychiatry*. 2005;17(3):173–182.
37. Volavka J, Citrome L. Pathways to aggression in schizophrenia affect results of treatment. *Schizophr Bull*. 2011;37(5):921–929.
38. Hakulinen C, Elovainio M, Arffman M, et al. Employment status and personal income before and after onset of a severe mental disorder: a case-control study. *Psychiatr Serv*. 2020;71(3):250–255.
39. Anderson KK, Norman R, MacDougall A, et al. Effectiveness of early psychosis intervention: comparison of service users and nonusers in population-based health administrative data. *Am J Psychiatry*. 2018;175(5):443–452.
40. Zhu Y, Chen L, Ji H, Xi M, Fang Y, Li Y. The risk and prevention of novel coronavirus pneumonia infections among inpatients in psychiatric hospitals. *Neurosci Bull*. 2020;36(3):299–302.
41. Korean Society of Infectious D, Korean Society of Pediatric Infectious D, Korean Society of E, Korean Society for Antimicrobial T, Korean Society for Healthcare-associated Infection C, Prevention, Korea Centers for Disease C, Prevention. Report on the epidemiological features of Coronavirus disease 2019 (COVID-19) outbreak in the Republic of Korea from January 19 to March 2, 2020. *J Korean Med Sci*. 2020;35(10):e112.
42. Kim MJ. How a South Korean psychiatric ward became a “medical disaster” when coronavirus hit. *Washington Post*. February 29, 2020. [https://www.washingtonpost.com/world/asia\\_pacific/how-a-south-korean-psychiatric-ward-became-a-medical-disaster-when-coronavirus-hit/2020/02/29/fe8f6e40-5897-11ea-8efd-0f904bdd8057\\_story.html](https://www.washingtonpost.com/world/asia_pacific/how-a-south-korean-psychiatric-ward-became-a-medical-disaster-when-coronavirus-hit/2020/02/29/fe8f6e40-5897-11ea-8efd-0f904bdd8057_story.html). Accessed March 27, 2020.
43. Wong SY, Lim WW, Que TL, Au DM. Reflection on SARS precautions in a severe intellectual disabilities hospital in Hong Kong. *J Intellect Disabil Res*. 2005;49(pt 5):379–384.
44. Miller D. Coronavirus on the inpatient unit: a new challenge for psychiatry. *Clin Psychiatry News*. March 13, 2020. <https://www.medge.com/psychiatry/article/219014/schizophrenia-other-psychotic-disorders/coronavirus-inpatient-unit-new>. Accessed March 25, 2020.
45. Mueser KT, Bond GR, Drake RE, Resnick SG. Models of community care for severe mental illness: a review of research on case management. *Schizophr Bull*. 1998;24(1):37–74.
46. Greenhalgh T, Wherton J, Shaw S, Morrison C. Video consultations for covid-19. *BMJ*. 2020;368:m998.
47. Hollander JE, Carr BG. Virtually perfect? Telemedicine for Covid-19 [published online ahead of print March 11, 2020]. *N Engl J Med*. doi:10.1056/NEJMp2003539
48. Kasckow J, Felmet K, Appelt C, Thompson R, Rotondi A, Haas G. Telepsychiatry in the assessment and treatment of schizophrenia. *Clin Schizophr Relat Psychoses*. 2014;8(1):21–27A.
49. Hulsbosch AM, Nugter MA, Tamis P, Kroon H. Videoconferencing in a mental health service in The Netherlands: a randomized controlled trial on patient satisfaction and clinical outcomes for outpatients with severe mental illness. *J Telemed Telecare*. 2017;23(5):513–520.
50. Robotham D, Satkunanathan S, Doughty L, Wykes T. Do we still have a digital divide in mental health? A five-year survey follow-up. *J Med Internet Res*. 2016;18(11):e309.
51. Ennis L, Rose D, Denis M, Pandit N, Wykes T. Can't surf, won't surf: the digital divide in mental health. *J Ment Health*. 2012;21(4):395–403.
52. D'Arcey J, Collaton J, Kozloff N, Voineskos AN, Kidd SA, Foussias G. The use of text messaging to improve clinical engagement for individuals with psychosis: systematic review. *JMIR Ment Health*. 2020;7(4):e16993.
53. Firth J, Torous J. Smartphone apps for Schizophrenia: a systematic review. *JMIR Mhealth Uhealth*. 2015;3(4):e102.
54. American Psychiatric Association. *Practice Guidance for COVID-19*. 2020. <https://www.psychiatry.org/psychiatrists/covid-19-coronavirus/practice-guidance-for-covid-19>. Accessed March 27, 2020.
55. Correll CU, Citrome L, Haddad PM, et al. The use of long-acting injectable antipsychotics in Schizophrenia: evaluating the evidence. *J Clin Psychiatry*. 2016;77(suppl 3):1–24.
56. Siskind D, McCartney L, Goldschlager R, Kisely S. Clozapine v. first- and second-generation antipsychotics in treatment-refractory schizophrenia: systematic review and meta-analysis. *Br J Psychiatry*. 2016;209(5):385–392.
57. Food and Drug Administration. *Policy for Certain REMS Requirements During the COVID-19 Public Health Emergency: Guidance for Industry and Health Care Professionals*. Food and Drug Administration; 2020. <https://www.fda.gov/media/136317/download>. Accessed March 27, 2020.
58. Food and Drug Administration. *FDA Guidance on Conduct of Clinical Trials of Medical Products during COVID-19 Pandemic: Guidance for Industry, Investigators, and Institutional Review Boards*. Rockville, MD: Food and Drug Administration; 2020. <https://www.fda.gov/media/136238/download>. Accessed March 25, 2020.
59. National Institutes of Health. *Guidance for NIH-funded Clinical Trials and Human Subjects Studies Affected by COVID-19*. Bethesda, MD: National Institutes of Health; 2020. <https://grants.nih.gov/grants/guide/notice-files/NOT-OD-20-087.html>. Accessed March 25, 2020.
60. Fleischhacker WW, Arango C, Arteel P, et al. Schizophrenia—time to commit to policy change. *Schizophr Bull*. 2014;40 suppl (3):S165–S194.
61. McDermott MM, Newman AB. Preserving clinical trial integrity during the coronavirus pandemic [published online ahead of print March 25, 2020]. *JAMA*. doi:10.1001/jama.2020.4689
